# Supplementary material
Source: PubMed Central journal article supplement (PMC3310947)
Supplement: NIHMS344884-supplement-Supp_Table_S1.pdf [file NIHMS344884-supplement-Supp_Table_S1.pdf]

## **Supplemental Information**

# **Synthesis of Potent Dishevelled PDZ Domain Inhibitors Guided by Virtual Screening and NMR Studies**

*Jufang Shan, Xinxin Zhang, Ju Bao, Robert Cassell and Jie J. Zheng*

### **Contents**

Scheme S1 – Page S2

Table S1 – Page S3

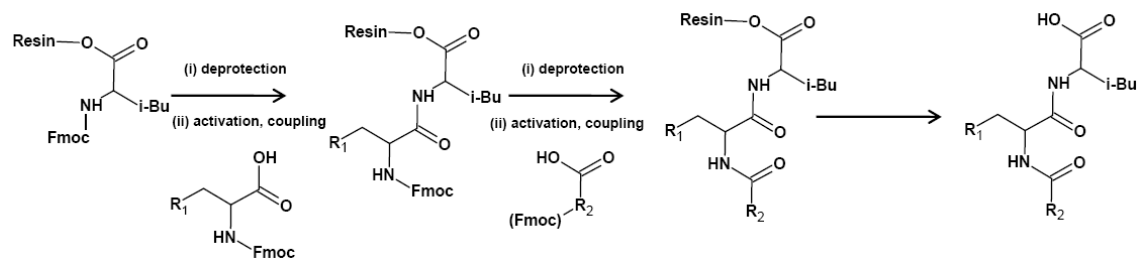

**Scheme S1.** Reagents and conditions: (i) de-protection: NMP, 20% piperadine, rt, 15min; (ii) coupling: NMP, Fmoc-amino acids (10eq), HBTU (9eq), and DIEA (10eq), 2h; (iii) cleavage: 90% TFA, 5% water, and 5% TIS, rt, 2h. The second residue used was Fmoc-protected 4-methylphenylalanine for compounds from library **J01** and Fmoc-protected phenylalanine from compounds from library **J02**. The last residue used was 3-fluorobenzoic acid for **J01-007** and **J02-001**; 3-cyanobenzoic acid for **J01-012**; 3-methylbenzoic acid for **J01-015**; 3-(phenylthio)benzoic acid for **J01-019**; 4-fluorobenzoic acid for **J02-002**. For **J01-016** the last residue used was Fmoc-protected 3-(aminomethyl) benzoic acid, which is not commercially available and was synthesized as follows. 3-(aminomethyl)benzoic acid was attached to a chlorotriyl resin using standard procedures. It was then allowed to react with N-(9-fluorenylmethyloxycarbonyloxy)succinimide and cleaved with 1% TFA in DCM, to yield the Fmoc-protected 3-(aminomethyl) benzoic acid.

**Table S1.** Verification of identity and purity of synthesized compounds

| Compound       | Sequence <sup>a</sup>                   | Theoretical Mass | Observed Mass <sup>b</sup> |
|----------------|-----------------------------------------|------------------|----------------------------|
| <b>J01-007</b> | 3-Fluorobenzoyl-(4-Me)Phe-Leu-OH        | 414.5            | 415.15                     |
| <b>J01-012</b> | 3-Cyanobenzoyl-(4-Me)Phe-Leu-OH         | 421.5            | 422.15                     |
| <b>J01-015</b> | 3-Methylbenzoyl-(4-Me)Phe-Leu-OH        | 410.5            | 411.16                     |
| <b>J01-016</b> | 3-(Aminomethyl)benzoyl-(4-Me)Phe-Leu-OH | 425.5            | 425.92                     |
| <b>J01-019</b> | 3-(Phenylthio)benzoyl-(4-Me)Phe-Leu-OH  | 504.6            | 505.17                     |
| <b>J02-001</b> | 3-Fluorobenzoyl-Phe-Leu-OH              | 400.4            | 399.33                     |
| <b>J02-002</b> | 4-Fluorobenzoyl-Phe-Leu-OH              | 400.4            | 399.19                     |
| <b>J01-17a</b> | 3,4-Difluoro-5-Me-benzoyl-Phe-Leu-OH    | 446.2            | 447.23                     |

<sup>a</sup> Compounds were synthesized from the C- to N-terminus, starting with Fmoc-protected Leu, which was attached to resin. 4-Methylphenylalanine (for **J01** compounds) or Phe (for **J02** compounds) was then attached, followed by addition of benzoic acid derivatives.

<sup>b</sup> Observed mass derived by mass spectra. The observed mass and theoretical mass of all compounds are similar, suggesting that the synthesized compounds have the intended identity.
