# Supplementary material
Source: PubMed Central journal article supplement (PMC3310947)

# Supplemental Scheme 1

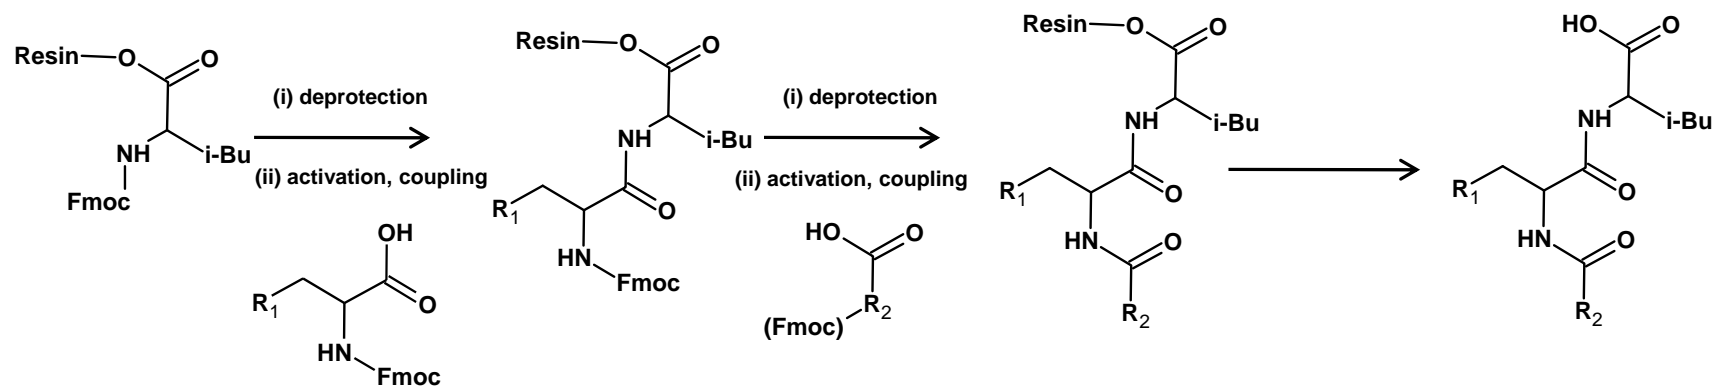

Supplement: NIHMS344884-supplement-Supp_Scheme_S1.pdf [file NIHMS344884-supplement-Supp_Scheme_S1.pdf]
